# Supplementary material for: Common elements of service delivery models that optimise quality of life and health service use among older people with advanced progressive conditions: a tertiary systematic review
Source: PubMed Central journal article supplement (PMC8638152; doi:10.1136/bmjopen-2020-048417), 2021-11-30
Supplement: bmjopen-2020-048417supp001.pdf [file bmjopen-2020-048417supp001.pdf]

Supplementary material 1. Eligibility criteria for WHO 'Rapid review of service delivery models for older people at the end of life to maximise quality of life.'

|   | <b>Inclusion</b>                                                                        |                                                                                                                                                                                                                                                                                                                                                                                                 | <b>Exclusion</b>                                                                                                                   |
|---|-----------------------------------------------------------------------------------------|-------------------------------------------------------------------------------------------------------------------------------------------------------------------------------------------------------------------------------------------------------------------------------------------------------------------------------------------------------------------------------------------------|------------------------------------------------------------------------------------------------------------------------------------|
| A | Participants at the end of life or living with advanced disease                         | Where information is available patients described as being in the last 1-2 years of life, or with advanced disease defined as advanced or metastatic cancer; chronic respiratory disease GOLD stage III-IV / grade C-D; heart failure New York Heart Association stage III or IV; progressive neurological disease; and frailty (excluding pre-frail)                                           | Participants not described as being at the end of life or do not have advanced disease                                             |
| B | Participants are older people                                                           | Where information is available at least 50% of the population must be greater than 60 years old or mean age greater than 60 years old                                                                                                                                                                                                                                                           | Where the information is available less than 50% of participants are older than 60 years old or mean age greater than 60 years old |
| C | Intervention must be a service delivery model aiming to improve quality of life         | Service model must be an overarching model of health care provision with multiple components and interacting elements                                                                                                                                                                                                                                                                           | Intervention is a single component intervention or focussing on post death intervention.                                           |
| D | Outcome must be focussed on quality of life, function and dignity or cost-effectiveness | Outcomes of quality of life, function and dignity to include wellbeing, resilience, personal satisfaction, empowerment, goal attainment, autonomy, independence, mastery, adaptation, symptoms including pain, breathlessness, anxiety, depression, constipation, falls, any measure of psychosocial or spiritual distress, patient and caregiver satisfaction<br>Outcome of cost effectiveness | Outcome not focussed on quality of life, function or dignity                                                                       |
| E | Design must be a review                                                                 | Review must have searched at least 2 sources, one of which must be an electronic database                                                                                                                                                                                                                                                                                                       | Non-review level paper e.g., primary intervention                                                                                  |
| F | Review may include controlled or non-controlled trials                                  | Review can include trials that are randomised (cluster, parallel, single-stage or cross-over design), non-randomised trials, controlled before-after studies, interrupted time series studies and repeated measures studies. Control group can include usual care, attention control, active control or no control                                                                              | Review focussing on opinion piece, case studies, case series or descriptive studies                                                |

## Supplementary material 2. Search Strategy for Medline

The search strategy was adapted for searches on The Cochrane Database of Systematic Reviews, CINAHL and Embase databases [14] and included studies published between January 2000 and October 2017.

|            | Population EoL /advanced disease                                                                                                                                                                                                                                                                                                                                                                                                                                                                              | Intervention e.g. hospital                                                                                                                                                                                                                                                                                                                                                                                                                                                                                | Outcome                                                                                                                                                                                                                                                                                                                                                                                                                                                                                                                                                                                 |
|------------|---------------------------------------------------------------------------------------------------------------------------------------------------------------------------------------------------------------------------------------------------------------------------------------------------------------------------------------------------------------------------------------------------------------------------------------------------------------------------------------------------------------|-----------------------------------------------------------------------------------------------------------------------------------------------------------------------------------------------------------------------------------------------------------------------------------------------------------------------------------------------------------------------------------------------------------------------------------------------------------------------------------------------------------|-----------------------------------------------------------------------------------------------------------------------------------------------------------------------------------------------------------------------------------------------------------------------------------------------------------------------------------------------------------------------------------------------------------------------------------------------------------------------------------------------------------------------------------------------------------------------------------------|
| MESH terms | Exp Terminally ill /<br>Exp Terminal care/<br>Palliative Care/<br>Frailty/                                                                                                                                                                                                                                                                                                                                                                                                                                    | Exp Patient admission/<br>Exp Patient readmission/<br>Geriatric nursing/<br>Primary nursing/<br>Hospice and palliative care nursing/<br>Exp Nursing services/<br>Symptom Assessment/<br>Geriatric Assessment/<br>Needs assessment/<br>Hospital volunteers/<br>Nursing process/<br>Exp Patient care planning/<br>Exp Progressive patient care/<br>Exp Caregivers/<br>Exp Home care services/<br>Exp Hospice care/<br>Exp Patient Care Team<br>Exp Continuity of Patient Care/                              | Exp Quality of life/<br>Exp Pain/<br>Exp Pain management/<br>Exp Dyspnea/<br>Exp Anxiety/<br>Exp Anxiety disorders/<br>Depression/<br>Exp Depressive disorder/<br>Personal satisfaction/<br>Exp Activities of daily living/<br>Constipation/<br>Accidental Falls/<br>Exp Mental health/<br>Exp Social isolation/<br>Exp Social support/<br>Exp Patient satisfaction/<br>Exp Budgets/<br>Exp Costs and cost analysis/<br>Economics/<br>Exp Economics, hospital/<br>Exp Economics, medical/<br>Economics, nursing/<br>Exp Fees and charges/<br>Exp Resource allocation/<br>Value of life/ |
| Key terms  | EoL.tw<br>End?of?life.tw<br>Dying.tw<br>Palliative.tw<br>Last adj4 life.tw<br>Hospice.tw<br>Life limit*.tw<br>Advanced disease*.tw<br>Palliative treatment.tw<br>Palliative medicine.tw<br>Terminal care.tw<br>Terminally ill.tw<br>End-of-life care.tw<br>Hospice care.tw<br>Palliation.tw.<br>Palliative care\$.tw.<br>Multi*morbidity.tw<br>Co*morbidity.tw<br>((Frail old*) AND (people OR adult* OR person*)).ti,ab<br>Frail*.tw<br>Frail elder*.ti,ab<br>Frailty syndrome*.ti,ab<br>Advanced illness.tw | Integrated care.tw<br>Model adj4 care.tw<br>Multi?disciplin*.tw<br>Multi?disciplinary team.tw<br>Volunteer*.tw<br>Volunt*.tw<br>Hospital adj3 home.tw<br>Comprehensive assess*.tw<br>Holistic assess*<br>(special\$ adj2 palliat\$).tw.<br>Nurse-led.tw<br>Co?ordination adj3 care.tw<br>Care plans.tw<br>Care?giver*.tw<br>Person?centr*.tw<br>Self?manage*.tw<br>Community health worker*.tw<br>Service delivery.tw<br>Community?based.tw<br>Home visit*.tw<br>Case management.tw<br>Care management.tw | Good death.tw<br>Symptom*.tw<br>Concern*.tw<br>Attainment<br>Dignity.tw<br>Empowerment.tw<br>Transition*.tw<br>Pain.tw<br>Dyspn?ea.tw<br>Breathless*.tw<br>Anxiety.tw<br>Anxious.tw<br>Depress*.tw<br>Quality of life.tw<br>QoL.tw<br>(quality adj2 life).tw.<br>Distress.tw<br>Wellbeing.tw<br>ADL*.tw<br>Activities of daily living.tw<br>Constipat*.tw<br>Fall*.tw<br>Mobil*.tw<br>Symptom management.tw.<br>Psychosocial.tw.<br>(psycho adj social).tw.<br>Psychological distress.tw.<br>Enablement.tw<br>Mastery.tw<br>Resilience.tw<br>Stress.tw<br>Financ*.tw                    |

|              |                                                                                                                                                                                                                                                                                                                                                                                                                                                                                                        |    |                                                                                                                                                                                                                                       |
|--------------|--------------------------------------------------------------------------------------------------------------------------------------------------------------------------------------------------------------------------------------------------------------------------------------------------------------------------------------------------------------------------------------------------------------------------------------------------------------------------------------------------------|----|---------------------------------------------------------------------------------------------------------------------------------------------------------------------------------------------------------------------------------------|
|              |                                                                                                                                                                                                                                                                                                                                                                                                                                                                                                        |    | (Cost* or economic*).ti<br>(Cost* adj2 (effective* or utilit* or benefit* or minimi*)).ab.<br>Economic model*.tw<br>(Budget* or fee* or financ* or pricing or price* or resource* allocat* or (value adj2 (monetary or money))).ti,ab |
| BOLEAN TERMS | OR                                                                                                                                                                                                                                                                                                                                                                                                                                                                                                     | OR | OR                                                                                                                                                                                                                                    |
|              | AND                                                                                                                                                                                                                                                                                                                                                                                                                                                                                                    |    |                                                                                                                                                                                                                                       |
| LIMIT        | ((Overview*.ti OR Review.ti OR Synthesis.ti OR Summary.ti OR Cochrane.ti OR Analysis.ti) AND (reviews.ti OR meta-analyses.ti OR articles.ti OR umbrella.ti)) OR "umbrella review".ti,ab OR (meta-review.ti.ab OR Metareview.ti,ab) OR ((overview*.ti OR Reviews.ti) AND (systematic.ti OR Cochrane.ti)) OR (reviews.ti,ab and (meta.ti,ab OR Published.ti,ab OR Quality.ti,ab OR Included.ti,ab OR summar*.ti,ab)) OR ("cochrane reviews".ti,ab) OR (evidence.ti AND (reviews.ti OR meta-analyses.ti)) |    |                                                                                                                                                                                                                                       |

## Supplementary material 3. Data extraction framework: CATWOE elements

| Service Delivery Model area (CATWOE)                                              | Model elements / processes                                        | Operational definition                                                                                                                                                                                 |
|-----------------------------------------------------------------------------------|-------------------------------------------------------------------|--------------------------------------------------------------------------------------------------------------------------------------------------------------------------------------------------------|
| <b>C(customers):</b><br>Target population and case mix                            | Population needs assessment                                       | Population targeted by the intervention                                                                                                                                                                |
|                                                                                   | Setting                                                           | Where intervention is delivered:<br><i>Hospital in-patients/ hospital out-patients/ home/ primary care/community / mixed settings</i>                                                                  |
| <b>A(actors):</b><br>Workforce including professions, level of skill and training | Multi-disciplinary team care                                      | Multi-disciplinary team comprises $\geq 3$ disciplines                                                                                                                                                 |
|                                                                                   | Rehabilitation expertise or training                              | Recognised rehabilitation expertise or training (i.e. Allied Health Professionals)                                                                                                                     |
|                                                                                   | End of life expertise or training                                 | Recognised Palliative Care expertise or training (i.e. Palliative Care physician/or specialist Palliative Clinical Nurse Specialist or explicit statement of palliative and end of life care training) |
|                                                                                   | Professional education                                            | Persons delivering intervention are educated and trained to nationally recognised standards and regulations.                                                                                           |
| <b>T(transformation process):</b> Service model elements / components             | Comprehensive Assessment                                          | I.e. comprehensive assessment- across multiple domains including physical/psychological/social/spiritual                                                                                               |
|                                                                                   | Case Management                                                   | Each person's overall care assigned to a team or individual                                                                                                                                            |
|                                                                                   | Collaborative Working                                             | Working across disciplines to plan services and deliver care to meet needs                                                                                                                             |
|                                                                                   | Route(s) of access, source and criteria for referral              | How are participants recruited or eligible to participate?                                                                                                                                             |
|                                                                                   | Professional psychosocial support                                 | Explicit psychological support offered as component of intervention (i.e. psychologist/counsellor/Social Worker)                                                                                       |
|                                                                                   | Contact established with primary care or attending physician      | Does interventionist contact physician as part of intervention?                                                                                                                                        |
|                                                                                   | Patient and family education                                      | Education for patient &/or family caregiver                                                                                                                                                            |
|                                                                                   | Individual multi-disciplinary care plan                           | Explicit description of multi-disciplinary team care plan                                                                                                                                              |
|                                                                                   | Medical intervention                                              | Medical intervention part of intervention, not alongside                                                                                                                                               |
|                                                                                   | Team case rounds                                                  | Intervention includes team meetings, not usual care meetings                                                                                                                                           |
| Practical support                                                                 | Any practical help i.e. in home, with medication boxes, equipment |                                                                                                                                                                                                        |

|                                                                                                           |                                                             |                                                                                                                         |
|-----------------------------------------------------------------------------------------------------------|-------------------------------------------------------------|-------------------------------------------------------------------------------------------------------------------------|
|                                                                                                           | Early rehabilitation assessment                             | Intervention includes rehabilitation early in course of persons integrated geriatric care or integrated palliative care |
|                                                                                                           | Systematic risk screening                                   | Risk screening part of intervention delivery                                                                            |
|                                                                                                           | Discharge planning                                          | Discharge planning a component of intervention                                                                          |
|                                                                                                           | Bereavement support                                         | As stated                                                                                                               |
|                                                                                                           | Spiritual support                                           | As stated                                                                                                               |
|                                                                                                           | Advance care planning                                       | Formal advanced care planning                                                                                           |
|                                                                                                           | Emergency response plan                                     | Emergency only or plan for acute changes, i.e. worsening symptoms                                                       |
|                                                                                                           | Self-management                                             | As stated                                                                                                               |
|                                                                                                           | Medication review                                           | Review part of intervention                                                                                             |
|                                                                                                           | Complexity/medication management                            | Ongoing management of medication during intervention                                                                    |
| <b>T: Mode of delivery</b>                                                                                | Physician home visits                                       | As part of intervention                                                                                                 |
|                                                                                                           | Physician available around the clock                        | As stated                                                                                                               |
|                                                                                                           | Interaction between professional and patient                | Face to face/telephone/online or combination                                                                            |
|                                                                                                           | Access to dedicated inpatient beds                          | As stated                                                                                                               |
|                                                                                                           | Around the clock home visits available                      | As stated                                                                                                               |
|                                                                                                           | Ongoing assessment                                          | Intervention includes multiple points of or ongoing assessment                                                          |
| <b>T: Operational tools &amp; guidance to support practice, e.g. assessment or decision support tools</b> | Chart in the home                                           | Diary, manual, medical/nursing record                                                                                   |
|                                                                                                           | Medical review: standardized admission assessment           | Explicitly reports standardised assessment is used                                                                      |
|                                                                                                           | Patient-centred care: standardized comprehensive assessment | Evidence of use comprehensive assessment tools or guidance relating to patient needs                                    |
| <b>W (worldview): Methods of integrated working</b>                                                       | Joint provision across health and social care               | Care involves explicit links between health and social care (in residential/nursing home care or home) providers        |
|                                                                                                           | Linkage with hospital                                       | Intervention involves links with hospital services or is provided by hospital                                           |
|                                                                                                           | Linkage between community services                          | Intervention involves links with community services                                                                     |
|                                                                                                           | Expert consultation with other providers                    | Intervention involves consultation with other multi-disciplinary teams.                                                 |
|                                                                                                           | Linkage with residential hospice                            | As stated                                                                                                               |
|                                                                                                           | One contact number                                          | As stated- but reports contact number given                                                                             |

|                                                                                   | Ongoing / continuous care                                                                                                                                                                                                              | Ongoing care following the intervention made explicit                                                                                                                                                                                                                                                                                                                                                                                                                                                       |
|-----------------------------------------------------------------------------------|----------------------------------------------------------------------------------------------------------------------------------------------------------------------------------------------------------------------------------------|-------------------------------------------------------------------------------------------------------------------------------------------------------------------------------------------------------------------------------------------------------------------------------------------------------------------------------------------------------------------------------------------------------------------------------------------------------------------------------------------------------------|
| <b>W: Conceptual model</b>                                                        | Patient directed goal driven care<br>Centrality of patient* needs<br>Care mandate -service driven or needs- and benefits-driven<br>Joint decision-making<br>Active patient participation<br>Patient engagement<br>Caregiver engagement | Patient involved in setting goals<br>Intervention focuses on individual patients needs<br>Service driven intervention = same intervention delivered to everyone with customisation and tailoring<br>Needs driven = patients' needs determine delivery of individualised intervention components<br>Patient involved in decision making during delivery of intervention<br>Involves client or patient actively participating in behaviours<br>Intervention targets patient<br>Intervention targets caregiver |
| <b>W: Provider Sector(s)</b>                                                      | Visiting volunteer sectors                                                                                                                                                                                                             | Volunteers explicitly involved in delivery of intervention                                                                                                                                                                                                                                                                                                                                                                                                                                                  |
| <b>O (Owners)</b>                                                                 | Location<br>World Bank status<br>Health service funding                                                                                                                                                                                | Country name<br>High, Upper middle, Low Middle, Low<br>State, private for profit, private non-profit, voluntary sector, other                                                                                                                                                                                                                                                                                                                                                                               |
| <b>E (environmental constraints):</b><br>Country setting, sites, human resources, | Enabling environment<br>Resource requirements -human resources                                                                                                                                                                         | Policy, infrastructure, workforce training, rural or urban settings<br>Human resources- name all professionals involved in intervention delivery                                                                                                                                                                                                                                                                                                                                                            |

\*for consistency, we decided to use term 'patient' while acknowledging that in some settings the term client may be interchangeable or preferred.

## Supplementary material 4. Mapping CATWOE domains to Logic Model template domains

| <b>CATWOE Domains</b>                          | → | <b>Logic Model Domains</b>                                                                                                                                   |
|------------------------------------------------|---|--------------------------------------------------------------------------------------------------------------------------------------------------------------|
| <b>C</b><br><b>(Customers)</b>                 |   | <b>Population</b><br>Target population and case mix                                                                                                          |
| <b>A</b><br><b>(Actors)</b>                    |   | <b>Service delivery</b><br>Workforce including professions, level of skill and training                                                                      |
| <b>T</b><br><b>(Transformation processes)</b>  |   | <b>Service delivery</b><br>Mode of delivery<br><b>Service components</b><br>Service model elements/components<br>Operational tools to support practice       |
| <b>W</b><br><b>(Worldview)</b>                 |   | <b>Service components</b><br>Methods of integrated working<br><b>Approach to service delivery</b><br>Conceptual model                                        |
| <b>E</b><br><b>(Environmental constraints)</b> |   | <b>Context</b><br>Setting, sites, size of population served, infrastructure<br><b>Implementation</b><br>Policy, workforce, training<br>resource requirements |

## Supplementary material 5. Included study characteristics

| Author / year                    | WHO Region | Country   | WBC Income status | Population                  | Setting          | Sample Size | QoL Outcome Measure                                                                                          | HSU                                                               |
|----------------------------------|------------|-----------|-------------------|-----------------------------|------------------|-------------|--------------------------------------------------------------------------------------------------------------|-------------------------------------------------------------------|
| <b>Integrated Geriatric Care</b> |            |           |                   |                             |                  |             |                                                                                                              |                                                                   |
| Applegate 1990[1]                | Americas   | USA       | High              | Acutely ill older people    | Hospital in-pts  | 156         | Basic self-care activities                                                                                   | n/a                                                               |
| Asplund 2000[2]                  | Europe     | Sweden    | High              | Acutely ill older people    | Hospital in-pts  | 190         | n/a                                                                                                          | Shorter hospital length of stay and reduced hospital readmissions |
| Austin 2005[3]                   | Europe     | UK        | High              | People with heart failure   | Hospital out-pts | 200         | Functional performance (6MWT), perceived exertion (Borg RPE), Minnesota living with heart failure            | n/a                                                               |
| Barnes 2012[4]                   | Americas   | USA       | High              | Acutely ill older people    | Hospital in-pts  | 1632        | n/a                                                                                                          | Shorter hospital length of stay and reduced hospital readmissions |
| Blue 2001[5]                     | Europe     | UK        | High              | People with heart failure   | Home             | 165         | n/a                                                                                                          | All cause and Heart Failure hospital readmission rates            |
| Burton 2013[6]                   | W. Pacific | Australia | High              | Older people                | Home             | 80          | Physical activity tests (i.e. sit to stand), Late life Disability Instrument, Late life function Instrument. | n/a                                                               |
| Capomollo 2002[7]                | Europe     | Italy     | High              | People with heart failure   | Hospital out-pts | 234         | n/a                                                                                                          | All cause hospital readmission rates                              |
| Chang 2005 [8]                   | Americas   | USA       | High              | People with heart failure   | Hospital out-pts | 95          | Minnesota Living with Heart Failure (MLWHF) and peace subscale of the spiritual quality of life.             | n/a                                                               |
| Clark 2013[9]                    | Americas   | USA       | High              | People with advanced cancer | Home             | 129         | Functional Assessment of Cancer Therapy-General (FACT-G) scale                                               | n/a                                                               |
| Clemson 2004[10]                 | W. Pacific | Australia | High              | Older people                | Community        | 310         | Number of falls; falls & mobility efficacy scales; Physical Activity Scale for the                           | n/a                                                               |



|                      |            |             |      |                           |                            |     |                                                                                                                                             |                                                                   |
|----------------------|------------|-------------|------|---------------------------|----------------------------|-----|---------------------------------------------------------------------------------------------------------------------------------------------|-------------------------------------------------------------------|
|                      |            |             |      |                           |                            |     | Elderly; worry scale; SF36 (physical components and mental components)                                                                      |                                                                   |
| Clemson 2012[11]     | W. Pacific | Australia   | High | Older people              | Home                       | 317 | Number of falls, balance and strength, EQ-5D, EQ-VAS, National Health and Nutrition Examination Survey (I), Late life function index, PASE. | n/a                                                               |
| Cline 1998[12]       | Europe     | Sweden      | High | People with heart failure | Mixed settings (IP, OP)    | 190 | The quality of life in heart failure questionnaire; Nottingham health profile, patient global health assessment                             | All cause hospital readmission rate                               |
| Close 1999[13]       | Europe     | UK          | High | Acutely ill older people  | Mixed settings (ER, H)     | 397 | Number of falls, Barthel Index                                                                                                              | n/a                                                               |
| Collard 1985[14]     | Americas   | USA         | High | Acutely ill older people  | Hospital in-pts            | 720 | Fewer Falls                                                                                                                                 | n/a                                                               |
| Counsell 2007[15]    | Americas   | USA         | High | Older people              | Home                       | 951 | SR36; Assets & Health Dynamics of the oldest old (AHEAD) survey                                                                             | Shorter hospital length of stay and reduced hospital readmissions |
| Covinsky 1997[16]    | Americas   | USA         | High | Acutely ill older people  | Hospital in-pts            | 650 | n/a                                                                                                                                         | Shorter hospital length of stay and reduced hospital readmissions |
| de Lusignan 2001[17] | Europe     | UK          | High | People with heart failure | Mixed settings (OP, H)     | 20  | General Health Questionnaire and Chronic heart failure symptomology questionnaire                                                           | n/a                                                               |
| Doughty 2002[18]     | W. Pacific | New Zealand | High | People with heart failure | Mixed settings (IP, H, OP) | 197 | Minnesota Living with Heart Failure Questionnaire                                                                                           | Hospital Readmission rate for Heart Failure,                      |
| Dunbar 2015[19]      | Americas   | USA         | High | People with heart failure | Mixed settings (IP, H, OP) | 134 | Minnesota Living with Heart Failure Questionnaire, EQ-5D, 6 minute walk test                                                                | n/a                                                               |
| Ekman 1998[20]       | Europe     | Sweden      | High | People with heart failure | Hospital out-pts           | 158 | n/a                                                                                                                                         | All cause hospital readmission rate                               |
| Fretwell 1990[21]    | Americas   | USA         | High | Acutely ill older people  | Mixed settings (IP, OP)    | 436 | n/a                                                                                                                                         | Hospital length of stay                                           |

|                   |          |             |      |                           |                         |     |                                                                                                                                                                                                                            |                                                       |
|-------------------|----------|-------------|------|---------------------------|-------------------------|-----|----------------------------------------------------------------------------------------------------------------------------------------------------------------------------------------------------------------------------|-------------------------------------------------------|
| Gary 2010[22]     | Americas | USA         | High | People with heart failure | Home                    | 74  | Minnesota Living with Heart Failure Questionnaire                                                                                                                                                                          | n/a                                                   |
| Gitlin 2006[23]   | Americas | USA         | High | Older people              | Home                    | 319 | Falls Efficacy Scale; three items from Activities-specific Balance Confidence Scale (confident walking up/down stairs, bending picking up slipper from floor., getting in/out of car without falling).                     | n/a                                                   |
| Goldberg 2003[24] | Americas | USA         | High | People with heart failure | Home                    | 282 | Medical Outcome Study 12 Item Short Form (SF-12), Medical Outcomes Study Health Distress Scale, Minnesota Living with Heart Failure Questionnaire, and overall Patient Satisfaction (single item) with heart failure care. | n/a                                                   |
| Harrison 2002[25] | Americas | Canada      | High | People with heart failure | Mixed settings (IP, H)  | 192 | Minnesota living with Heart Failure Questionnaire, SF 36                                                                                                                                                                   | Hospital Readmission rate                             |
| Jaarsma 1999[26]  | Europe   | Netherlands | High | People with heart failure | Mixed settings (IP, H)  | 179 | Heart failure Self-Care Behaviour                                                                                                                                                                                          | Hospital Readmission rate                             |
| Jerant 2001[27]   | Americas | USA         | High | People with heart failure | Home                    | 37  | n/a                                                                                                                                                                                                                        | All cause and Heart Failure hospital readmission rate |
| Kasper 2002[28]   | Americas | USA         | High | People with heart failure | Mixed settings (IP, OP) | 200 | Minnesota living with heart failure, Duke activity status index                                                                                                                                                            | Readmissions                                          |
| Krumholz 2002[29] | Americas | USA         | High | People with heart failure | Mixed settings          | 88  | n/a                                                                                                                                                                                                                        | Hospital Readmission rate                             |
| Lang 2018[30]     | Europe   | UK          | High | People with heart failure | Home                    | 50  | Minnesota Living with Heart Failure Questionnaire; Hospital anxiety and depression scale; EQ-5D                                                                                                                            | n/a                                                   |
| Laramee 2003[31]  | Americas | USA         | High | People with heart failure | Mixed settings (IP, H)  | 287 | n/a                                                                                                                                                                                                                        | Hospital Readmission rate for Heart Failure           |
| Ledwidge 2003[32] | Europe   | Ireland     | High | People with heart failure | Mixed settings (IP, H)  | 98  | n/a                                                                                                                                                                                                                        | Heart Failure hospital readmission rates              |

|                      |          |        |      |                           |                            |     |                                                                                                                                                                                                                                         |                                                       |
|----------------------|----------|--------|------|---------------------------|----------------------------|-----|-----------------------------------------------------------------------------------------------------------------------------------------------------------------------------------------------------------------------------------------|-------------------------------------------------------|
| Luskin 2002[33]      | Americas | USA    | High | People with heart failure | Hospital out-pts           | 33  | Geriatric Depression Scale, Perceived Stress Scale, Life Orientation Test, State Trait Anxiety Inventory, Medical Outcome Survey Questions 3 and 9, Minnesota Living with Heart Failure, Self-report physical fitness, Six-minute walk, | n/a                                                   |
| Markle-Reid 2010[34] | Americas | Canada | High | Older people              | Home                       | 109 | Mean number of falls during 6-month Follow-Up                                                                                                                                                                                           | n/a                                                   |
| McVey 1989[35]       | Americas | USA    | High | Acutely ill older people  | Hospital in-pts            | 178 | Measurements of Activities of Daily Living                                                                                                                                                                                              | n/a                                                   |
| Naylor 1994[36]      | Americas | USA    | High | Acutely ill older people  | Mixed settings (IP, H)     | 276 | n/a                                                                                                                                                                                                                                     | Hospital Readmission rate                             |
| Naylor 1999[37]      | Americas | USA    | High | Acutely ill older people  | Mixed settings (IP, OP, H) | 363 | n/a                                                                                                                                                                                                                                     | All cause hospital readmission rate                   |
| Northouse 2007[38]   | Americas | USA    | High | People with cancer        | Home                       | 263 | Functional Assessment of Cancer Therapy-General (FACT-G) scale                                                                                                                                                                          | n/a                                                   |
| Pugh 2001[39]        | Americas | USA    | High | People with heart failure | Mixed settings             | 58  | n/a                                                                                                                                                                                                                                     | Hospital Readmission rate for Heart Failure           |
| Rainville 1999[40]   | Americas | USA    | High | People with heart failure | Mixed settings (OP, H)     | 34  | n/a                                                                                                                                                                                                                                     | Heart Failure hospital readmission rate               |
| Rich 1995[41]        | Americas | USA    | High | People with heart failure | Mixed settings (IP, OP)    | 282 | Chronic Heart Failure Questionnaire                                                                                                                                                                                                     | All cause hospital readmission rate                   |
| Rich 1993[42]        | Americas | USA    | High | People with heart failure | Mixed setting (IP, OP)     | 98  | Chronic Heart Failure Questionnaire                                                                                                                                                                                                     | Readmission during follow-up                          |
| Riegel 2002[43]      | Americas | USA    | High | People with heart failure | Home                       | 358 | n/a                                                                                                                                                                                                                                     | All cause and Heart Failure hospital readmission rate |
| Rubenstein 1984[44]  | Americas | USA    | High | Acutely ill older people  | Hospital in-pts            | 123 | Personal Self-maintenance scale;                                                                                                                                                                                                        | n/a                                                   |
| Rubin 1993[45]       | Americas | USA    | High | Acutely ill older people  | Community                  | 200 | Katz Activities of daily living Index, Instrumental Activities of Daily Living (Five-Item OARS Scale)                                                                                                                                   | n/a                                                   |

|                     |            |           |      |                           |                            |     |                                                                                                                                                                                                                       |                                                       |
|---------------------|------------|-----------|------|---------------------------|----------------------------|-----|-----------------------------------------------------------------------------------------------------------------------------------------------------------------------------------------------------------------------|-------------------------------------------------------|
|                     |            |           |      |                           |                            |     |                                                                                                                                                                                                                       |                                                       |
| Saltvedt 2006[46]   | Europe     | Norway    | High | Acutely ill older people  | Hospital in-pts            | 254 | Barthel Index                                                                                                                                                                                                         | n/a                                                   |
| Serxner 1998[47]    | Americas   | USA       | High | People with heart failure | Hospital out-pts           | 109 | n/a                                                                                                                                                                                                                   | Hospital Readmission rate                             |
| Sherwood 2017[48]   | Americas   | USA       | High | People with heart failure | Community                  | 180 | Global score Kansas City Cardiomyopathy Questionnaire (KCCQ); Beck Depression Inventory II; Spielberger State-Trait Anxiety Inventory; Heart Failure Attitudes about Impairment Questionnaire, 6-minute walking test. | Reducing worsening heart failure hospitalisations     |
| Stewart S 1998[49]  | W. Pacific | Australia | High | People with heart failure | Mixed settings (IP, H)     | 97  | n/a                                                                                                                                                                                                                   | All cause and Heart Failure hospital readmission rate |
| Stewart M 1999 [50] | Americas   | USA       | High | Acutely ill older people  | Hospital in-pts            | 61  | n/a                                                                                                                                                                                                                   | All cause and Heart Failure hospital readmission rate |
| Stromberg 2003[51]  | Europe     | Sweden    | High | People with heart failure | Hospital out-pts           | 106 | n/a                                                                                                                                                                                                                   | Heart Failure hospital readmission rate               |
| Thomas 1993[52]     | Americas   | USA       | High | Acutely ill older people  | Hospital in-pts            | 120 | Katz Functional activity rating scale ADL                                                                                                                                                                             | Hospital length of stay                               |
| Trochu 2004[53]     | Europe     | France    | High | People with heart failure | Mixed settings (OP, H)     | 202 | n/a                                                                                                                                                                                                                   | All cause and Heart Failure hospital readmission rate |
| Tsuyuki 2004[54]    | Americas   | Canada    | High | People with heart failure | Mixed settings (IP, OP, H) | 276 | n/a                                                                                                                                                                                                                   | Hospital Readmission rate for Heart Failure           |
| Varma 1999[55]      | Europe     | UK        | High | People with heart failure | Mixed settings (OP, H)     | 83  | Minnesota living with Heart Failure Questionnaire and the SF-36                                                                                                                                                       | n/a                                                   |
| Vidan 2009[56]      | Europe     | Spain     | High | Acutely ill older people  | Hospital in-pts            | 542 | Independence in 6 basic Activities of daily living, bathing, dressing, toileting, transferring from bed to chair, continence, and eating.                                                                             | Length of hospital stay                               |
| Wang 2016[57]       | SE Asia    | Taiwan    | High | People with heart failure | Hospital out-pts           | 92  | Piper fatigue Scale (PFS) , Minnesota living with HF                                                                                                                                                                  | n/a                                                   |

|                                   |          |                  |             |                                |                        |     |                                                                                                                                                                                                                   |                         |
|-----------------------------------|----------|------------------|-------------|--------------------------------|------------------------|-----|-------------------------------------------------------------------------------------------------------------------------------------------------------------------------------------------------------------------|-------------------------|
|                                   |          |                  |             |                                |                        |     | questionnaire (MLHFQ)<br>symptom distress, anxiety                                                                                                                                                                |                         |
| Yu 2010[58]                       | SE Asia  | Hong Kong, China | High        | People with heart failure      | Hospital out-pts       | 158 | World Health Organization Quality of Life Questionnaire (WHOQOL-BREF-HK)                                                                                                                                          | n/a                     |
| Zelada 2009[59]                   | Americas | Peru             | High middle | Acutely ill older people       | Hospital in-pts        | 143 | Katz Scale                                                                                                                                                                                                        | Length of hospital stay |
| <b>Integrated Palliative Care</b> |          |                  |             |                                |                        |     |                                                                                                                                                                                                                   |                         |
| Bakitas 2009[60]                  | Americas | USA              | High        | People with advanced cancer    | Home                   | 322 | Functional Assessment of Chronic Illness Therapy for Palliative Care; Edmonton Symptom Assessment Scale                                                                                                           | n/a                     |
| Bakitas 2015[61]                  | Americas | USA              | High        | People with advanced cancer    | Mixed settings (OP, H) | 207 | Functional Assessment of Chronic Illness Therapy for Palliative Care (FACIT-PAL); FACIT-PAL Treatment Outcome Index; Quality at End of Life (Qual-E), Center for Epidemiological Studies-Depression Scale (CES-D) | n/a                     |
| Brannstrom 2014[62]               | Europe   | Sweden           | High        | People with heart failure      | Mixed settings (OP, H) | 72  | Edmonton Symptom Assessment System (ESAS), EQ-5D, Kansas City Cardiomyopathy Questionnaire (KCCQ)                                                                                                                 | n/a                     |
| Edmonds 2010[63]                  | Europe   | UK               | High        | People with multiple sclerosis | Mixed settings (OP, H) | 52  | Multiple Sclerosis Impact Scale (MSIS), Palliative Outcome Scale, Modified Lawton Positivity Questionnaire                                                                                                        | n/a                     |
| Given 2002[64]                    | Americas | USA              | High        | People with cancer             | Home                   | 113 | SF-36                                                                                                                                                                                                             | n/a                     |
| Higginson 2014[65]                | Europe   | UK               | High        | People with advanced diseases  | Mixed settings (OP, H) | 105 | Chronic Respiratory Disease Questionnaire (mastery), Breathlessness severity, London Chest Activities of Daily Living Questionnaire, EQ-5D & EQ-VAS, Palliative                                                   | n/a                     |

|                     |          |        |             |                             |                            |     |                                                                                                                                                                                                                                                                                          |     |
|---------------------|----------|--------|-------------|-----------------------------|----------------------------|-----|------------------------------------------------------------------------------------------------------------------------------------------------------------------------------------------------------------------------------------------------------------------------------------------|-----|
|                     |          |        |             |                             |                            |     | outcome scale, Hospital anxiety and depression scale.                                                                                                                                                                                                                                    |     |
| Jordhoy 2001[66]    | Europe   | Norway | High        | People with advanced cancer | Mixed settings (IP, OP, H) | 434 | European Organisation for Research and Treatment of Cancer Quality of Life Questionnaire C30 (EORTC QLQ-C30)                                                                                                                                                                             | n/a |
| Lowther 2015[67]    | Africa   | Kenya  | Low middle  | People with HIV             | Hospital out-pts           | 120 | African Palliative Care Outcome Scale                                                                                                                                                                                                                                                    | n/a |
| Maltoni 2016[68]    | Europe   | Italy  | High        | People with advanced cancer | Hospital out-pts           | 207 | Functional Assessment of Cancer Therapy-Hepato-biliary (FACT-HEP) and FACT-HEP Trial Outcome Index.                                                                                                                                                                                      | n/a |
| Ozcelik 2014[69]    | Europe   | Turkey | High middle | People with advanced cancer | Mixed settings (IP, OP, H) | 44  | Edmonton Symptom Assessment Scale (ESAS) and European Organisation for Research and Treatment of Cancer Quality of Life Questionnaire C30 (EORTC QLQ C30)                                                                                                                                | n/a |
| Rogers 2017[70]     | Americas | USA    | High        | People with heart failure   | Mixed settings (IP, OP, H) | 150 | Kansas City Cardiomyopathy questionnaire (KCCQ), Functional assessment of chronic illness therapy palliative care scale (FACIT-Pal) assessed at 6 months. Hospital Anxiety and Depression Scale (HADS), Functional Assessment of Chronic Illness Therapy—Spiritual Well-Being [FACIT-Sp) | n/a |
| Rummans 2006[71]    | Americas | USA    | High        | People with advanced cancer | Hospital out-pts           | 115 | Spitzer QoL Uniscale and Linear analog scales of assessment                                                                                                                                                                                                                              | n/a |
| Sidebottom 2015[72] | Americas | USA    | High        | People with heart failure   | Hospital in-pts            | 232 | Minnesota living with Heart Failure Questionnaire                                                                                                                                                                                                                                        | n/a |
| Steel 2016[73]      | Americas | USA    | High        | People with advanced cancer | Mixed settings (OP, H)     | 261 | Center for epidemiological studies Depression scale                                                                                                                                                                                                                                      | n/a |

|                     |            |           |      |                             |                        |     |                                                                                                                                                                                                                                                                                            |     |
|---------------------|------------|-----------|------|-----------------------------|------------------------|-----|--------------------------------------------------------------------------------------------------------------------------------------------------------------------------------------------------------------------------------------------------------------------------------------------|-----|
|                     |            |           |      |                             |                        |     | (CES-D), Brief pain inventory, FACT-Hepatobiliary.                                                                                                                                                                                                                                         |     |
| Tattersall 2014[74] | W. Pacific | Australia | High | People with advanced cancer | Hospital out-pts       | 120 | McGill QoL questionnaire, Rotterdam Symptom Checklist                                                                                                                                                                                                                                      | n/a |
| Temel 2010[75]      | Americas   | USA       | High | People with advanced cancer | Hospital out-pts       | 151 | Functional Assessment of Cancer Therapy - Lung; Hospital Anxiety and Depression Scale; Patient Health Questionnaire                                                                                                                                                                        | n/a |
| Temel 2017[76]      | Americas   | US        | High | People with advanced cancer | Hospital out-pts       | 350 | Functional Assessment of Cancer Therapy-General (FACT-G) scale; Patient Health Questionnaire-9 (PHQ-9); Hospital Anxiety and Depression Scale(HADS)                                                                                                                                        | n/a |
| Wong 2016[77]       | SE Asia    | China     | High | People with heart failure   | Home                   | 84  | MQOL-HK, McGill Quality of Life Questionnaire–Hong Kong adaptation                                                                                                                                                                                                                         | n/a |
| Zimmermann 2014[78] | Americas   | Canada    | High | People with advanced cancer | Mixed settings (OP, H) | 461 | Functional Assessment of Chronic Illness Therapy Spiritual Well-Being [FACIT-Sp]; Quality of Life at the End of Life (Qual E); Edmonton Symptom Assessment System (ESAS); satisfaction with care (FAMCARE); Cancer Rehabilitation Evaluation System Medical Interaction Subscale CARES-MIS | n/a |

Key: IP =In-patients; OP = out-patients, ER =Emergency Room, H= home; WBC= World Bank Classification n/a = not assessed or not assessed in meta-analysis

## Supplementary material 6. Assessment of Methodological Quality in Included Reviews (AMSTAR)

| First Author, Year | A priori design provided | Duplicate study selection/ data extraction | Systematic literature search performed | Status of publication used as an inclusion criterion | List of studies (included and excluded) provided | Characteristics of the included studies provided | Scientific quality of included studies assessed and documented | Scientific quality of included studies used appropriately in formulating conclusions? | Were the methods used to combine the findings of the studies appropriate? | Was the likelihood of publication bias assessed? | Was the conflict of interest included? | Total |
|--------------------|--------------------------|--------------------------------------------|----------------------------------------|------------------------------------------------------|--------------------------------------------------|--------------------------------------------------|----------------------------------------------------------------|---------------------------------------------------------------------------------------|---------------------------------------------------------------------------|--------------------------------------------------|----------------------------------------|-------|
| Cui 2019           | No                       | Yes                                        | Yes                                    | Yes                                                  | No                                               | No                                               | Yes                                                            | No                                                                                    | Yes                                                                       | Yes                                              | Yes                                    | 7     |
| De Coninck, 2017   | Yes                      | No                                         | Yes                                    | No                                                   | Yes                                              | Yes                                              | Yes                                                            | Yes                                                                                   | Yes                                                                       | No                                               | No                                     | 7     |
| Ekdahl 2015        | No                       | Yes                                        | Yes                                    | No                                                   | No                                               | Yes                                              | Yes                                                            | Yes                                                                                   | Yes                                                                       | No                                               | No                                     | 6     |
| Fox 2012           | Yes                      | Yes                                        | Yes                                    | No                                                   | Yes                                              | Yes                                              | Yes                                                            | Yes                                                                                   | Yes                                                                       | Yes                                              | Yes                                    | 9     |
| Fulton 2019        | Yes                      | Yes                                        | Yes                                    | No                                                   | Yes                                              | Yes                                              | Yes                                                            | Yes                                                                                   | Yes                                                                       | No                                               | Yes                                    | 9     |
| Haun 2017          | Yes                      | Yes                                        | Yes                                    | Yes                                                  | Yes                                              | Yes                                              | Yes                                                            | Yes                                                                                   | Yes                                                                       | Yes                                              | No                                     | 9     |
| Kavalieratos 2016  | Yes                      | Yes                                        | Yes                                    | No                                                   | No                                               | Yes                                              | Yes                                                            | Yes                                                                                   | Yes                                                                       | Yes                                              | No                                     | 8     |
| McAlister 2004     | Yes                      | Yes                                        | Yes                                    | No                                                   | No                                               | No                                               | No                                                             | No                                                                                    | Yes                                                                       | No                                               | No                                     | 4     |
| Phillips 2004      | Yes                      | Yes                                        | Yes                                    | No                                                   | No                                               | Yes                                              | Yes                                                            | Yes                                                                                   | Yes                                                                       | Yes                                              | No                                     | 8     |
| Kassianos 2018     | Yes                      | Yes                                        | Yes                                    | Yes                                                  | No                                               | Yes                                              | Yes                                                            | Yes                                                                                   | Yes                                                                       | Yes                                              | Yes                                    | 10    |
| <b>Median</b>      |                          |                                            |                                        |                                                      |                                                  |                                                  |                                                                |                                                                                       |                                                                           |                                                  | <b>8</b>                               |       |



## Supplementary material 7. Risk of Bias Table for included studies

| Author/ Year                     | Randomisation Sequence generation | Allocation Concealment | Blinding of participants and personnel | Blinding of outcome assessments | Incomplete outcome assessment | Selective reporting | Other bias |
|----------------------------------|-----------------------------------|------------------------|----------------------------------------|---------------------------------|-------------------------------|---------------------|------------|
| <b>Integrated Geriatric Care</b> |                                   |                        |                                        |                                 |                               |                     |            |
| Applegate 1990                   | Low                               | High                   | High                                   | High                            | Low                           | Low                 | Low        |
| Asplund 2000                     | Low                               | Low                    | High                                   | High                            | High                          | Unclear             | Low        |
| Austin 2005                      | Low                               | Low                    | Low                                    | Unclear                         | Low                           | Low                 | Unclear    |
| Barnes 2012                      | Low                               | High                   | High                                   | High                            | Unclear                       | Low                 | Low        |
| Blue 2001                        | Unclear                           | Unclear                | High                                   | Unclear                         | Unclear                       | High                | Unclear    |
| Burton 2013                      | Low                               | Low                    | High                                   | High                            | Low                           | Low                 | Unclear    |
| Capamello 2002                   | High                              | High                   | High                                   | Unclear                         | Unclear                       | High                | High       |
| Chang 2005                       | Low                               | Unclear                | Unclear                                | Unclear                         | Low                           | Low                 | Unclear    |
| Clark M 2013                     | High                              | High                   | High                                   | High                            | High                          | Unclear             | Unclear    |
| Clemson 2004                     | High                              | Low                    | High                                   | Low                             | High                          | Low                 | Unclear    |
| Clemson 2012                     | Low                               | Low                    | High                                   | Low                             | Low                           | Low                 | Unclear    |
| Cline 1998                       | Low                               | Low                    | High                                   | Unclear                         | Low                           | Low                 | Unclear    |
| Close 1999                       | Low                               | Low                    | High                                   | High                            | Low                           | High                | Low        |
| Collard 1985                     | Low                               | High                   | Low                                    | Unclear                         | High                          | High                | Low        |
| Counsell 2007                    | Low                               | Low                    | Low                                    | Low                             | Unclear                       | Unclear             | Low        |
| Covinsky 1997                    | Low                               | Low                    | Unclear                                | Unclear                         | Low                           | Low                 | Low        |
| de Lusigan 2001                  | Low                               | Unclear                | High                                   | Unclear                         | Low                           | Low                 | Unclear    |
| Doughty 2002                     | Low                               | Low                    | High                                   | Unclear                         | Low                           | Low                 | Unclear    |
| Dunbar 2015                      | Low                               | Low                    | Low                                    | Unclear                         | Low                           | Low                 | Unclear    |
| Ekman 1998                       | Low                               | Unclear                | High                                   | Unclear                         | Unclear                       | High                | Unclear    |
| Fretwell 1990                    | Unclear                           | Unclear                | Unclear                                | Unclear                         | Low                           | Low                 | Low        |
| Gary 2010                        | Unclear                           | Unclear                | High                                   | Low                             | Low                           | Low                 | Unclear    |
| Gitlin 2006                      | Low                               | Low                    | High                                   | Low                             | Low                           | Low                 | Low        |
| Goldberg 2003                    | Low                               | Low                    | High                                   | High                            | Low                           | Low                 | Unclear    |
| Harrison 2002                    | Low                               | Low                    | Low                                    | Unclear                         | Low                           | Low                 | Unclear    |
| Jaarsma 1999                     | Low                               | Unclear                | Unclear                                | Low                             | Low                           | Low                 | Unclear    |
| Jerant 2001                      | Low                               | Unclear                | High                                   | High                            | Low                           | High                | Unclear    |
| Kasper 2002                      | Low                               | Unclear                | Unclear                                | Unclear                         | Low                           | Low                 | Unclear    |
| Krumholz 2002                    | Unclear                           | Unclear                | High                                   | Low                             | Low                           | High                | Unclear    |
| Lang 2018                        | Low                               | Unclear                | High                                   | Low                             | Low                           | Low                 | Unclear    |
| Laramee 2003                     | Unclear                           | Unclear                | High                                   | High                            | Unclear                       | High                | Unclear    |
| Ledwidge 2003                    | High                              | High                   | High                                   | Unclear                         | Low                           | High                | Unclear    |
| Luskin 2002                      | High                              | Unclear                | High                                   | Unclear                         | Low                           | Low                 | Unclear    |
| Markle-Reid 2010                 | Low                               | Low                    | High                                   | Low                             | Low                           | Low                 | Unclear    |
| McVey 1989                       | Low                               | Low                    | High                                   | Low                             | High                          | High                | Unclear    |
| Naylor 1994                      | Low                               | Low                    | Low                                    | Unclear                         | Low                           | High                | Unclear    |
| Naylor 1999                      | Low                               | Low                    | Low                                    | Low                             | Low                           | High                | Unclear    |
| Northouse 2007                   | Low                               | Low                    | High                                   | High                            | Low                           | Low                 | Low        |
| Pugh 2001                        | High                              | High                   | High                                   | High                            | High                          | High                | High       |
| Rainville 1999                   | High                              | High                   | Unclear                                | High                            | Low                           | High                | High       |
| Rich 1995                        | Low                               | Low                    | Low                                    | Unclear                         | Low                           | Low                 | Unclear    |

|                                   |         |         |         |         |         |         |         |
|-----------------------------------|---------|---------|---------|---------|---------|---------|---------|
| Rich 1993                         | High    | High    | High    | High    | Low     | High    | High    |
| Riegel 2002                       | High    | High    | High    | Unclear | Unclear | High    | High    |
| Rubenstein 1984                   | Unclear | Unclear | High    | Unclear | High    | Low     | Unclear |
| Rubin 1993                        | Low     | Low     | High    | Low     | High    | Low     | Unclear |
| Saltvedt 2006                     | Low     | Low     | High    | Low     | High    | Low     | Low     |
| Serxner 1998                      | Unclear | Unclear | High    | High    | High    | High    | High    |
| Sherwood 2017                     | Low     | Low     | High    | Unclear | Low     | Low     | Unclear |
| Stewart S 1998                    | Unclear | Unclear | High    | High    | Low     | High    | High    |
| Stewart M 1999 (Fox)              | High    | Unclear | Unclear | Unclear | Unclear | Unclear | Low     |
| Stromberg 2003                    | Low     | Low     | High    | Low     | Low     | High    | Unclear |
| Thomas 1993                       | Low     | Low     | High    | High    | High    | Low     | Low     |
| Trochu 2004                       | Unclear | Unclear | Unclear | Unclear | Unclear | Unclear | Unclear |
| Tsuyuki 2004                      | Low     | Low     | High    | Unclear | Low     | Unclear | Unclear |
| Varma 1999                        | Unclear | Unclear | Unclear | High    | High    | High    | High    |
| Vidan 2009                        | High    | Unclear | Unclear | Unclear | High    | Unclear | Low     |
| Wang 2016                         | Unclear | Unclear | High    | Low     | High    | Unclear | Unclear |
| Yu 2010                           | High    | High    | High    | High    | High    | Unclear | Unclear |
| Zeleda 2009                       | High    | Unclear | Unclear | Unclear | High    | Unclear | Low     |
| <b>Integrated Palliative Care</b> |         |         |         |         |         |         |         |
| Bakitas 2009                      | Low     | High    | High    | Unclear | Low     | Low     | Low     |
| Bakitas 2015                      | Low     | Unclear | High    | Low     | Low     | Low     | High    |
| Brannstrom 2014                   | Unclear | Low     | High    | Low     | High    | High    | High    |
| Edmonds 2010                      | Low     | Low     | High    | Low     | Unclear | Low     | Unclear |
| Given 2002                        | Low     | Unclear | High    | High    | Unclear | High    | Low     |
| Higginson 2014                    | Low     | Low     | High    | High    | Low     | Low     | Low     |
| Jordhoy 2001                      | Unclear | Unclear | High    | High    | Low     | Low     | Low     |
| Lowther 2015                      | Low     | Low     | High    | High    | Low     | Low     | Low     |
| Maltoni 2016                      | Low     | Low     | High    | Unclear | Low     | Low     | Low     |
| Ozcelik 2014                      | High    | High    | High    | High    | Low     | High    | Unclear |
| Rogers 2017                       | Low     | Unclear | High    | High    | Low     | Low     | Unclear |
| Rummans 2006                      | Low     | Low     | High    | Low     | Low     | Low     | Low     |
| Sidebottom 2015                   | Unclear | Unclear | High    | High    | Low     | Low     | Low     |
| Steel 2016                        | Low     | Low     | High    | High    | Low     | High    | High    |
| Tattersall 2014                   | Low     | Low     | High    | Unclear | High    | Unclear | Unclear |
| Temel 2010                        | Low     | High    | High    | Unclear | Low     | Low     | Low     |
| Temel 2017                        | Low     | Low     | High    | Low     | Low     | Unclear | Unclear |
| Wong 2016                         | Low     | Low     | Unclear | High    | Low     | High    | Low     |
| Zimmerman 2014                    | Low     | High    | Low     | High    | Low     | Low     | Low     |

## References

1. Applegate, W.B., et al., *A randomized, controlled trial of a geriatric assessment unit in a community rehabilitation hospital*. New England Journal of Medicine, 1990. **322**(22): p. 1572-1578.
2. Asplund, K., et al., *Geriatric-based versus general wards for older acute medical patients: a randomized comparison of outcomes and use of resources*. Journal of the American Geriatrics Society, 2000. **48**(11): p. 1381-1388.
3. Austin, J., et al., *Randomised controlled trial of cardiac rehabilitation in elderly patients with heart failure*. European Journal of Heart Failure, 2005. **7**(3): p. 411-417.

4. Barnes, D.E., et al., *Acute care for elders units produced shorter hospital stays at lower cost while maintaining patients' functional status*. Health Affairs, 2012. **31**(6): p. 1227-1236.
5. Blue, L., et al., *Randomised controlled trial of specialist nurse intervention in heart failure*. BMJ, 2001. **323**(7315): p. 715-718.
6. Burton, E., et al., *Effectiveness of a lifestyle exercise program for older people receiving a restorative home care service: a pragmatic randomized controlled trial*. Clinical interventions in aging, 2013. **8**: p. 1591.
7. Capomolla, S., et al., *Cost/utility ratio in chronic heart failure: comparison between heart failure management program delivered by day-hospital and usual care*. Journal of the American College of Cardiology, 2002. **40**(7): p. 1259-1266.
8. Chang, B.-H., et al., *A relaxation response randomized trial on patients with chronic heart failure*. Journal of Cardiopulmonary Rehabilitation and Prevention, 2005. **25**(3): p. 149-157.
9. Clark, M.M., et al., *Randomized controlled trial of maintaining quality of life during radiotherapy for advanced cancer*. Cancer, 2013. **119**(4): p. 880-887.
10. Clemson, L., et al., *The effectiveness of a community-based program for reducing the incidence of falls in the elderly: A randomized trial*. Journal of the American Geriatrics Society, 2004. **52**(9): p. 1487-1494.
11. Clemson, L., et al., *Integration of balance and strength training into daily life activity to reduce rate of falls in older people (the LiFE study): randomised parallel trial*. Bmj, 2012. **345**: p. e4547.
12. Cline, C., et al., *Cost effective management programme for heart failure reduces hospitalisation*. Heart, 1998. **80**(5): p. 442-446.
13. Close, J., et al., *Prevention of falls in the elderly trial (PROFET): a randomised controlled trial*. The Lancet, 1999. **353**(9147): p. 93-97.
14. Collard, A.F., S.S. Bachman, and D.F. Beatrice, *Acute care delivery for the geriatric patient: an innovative approach*. QRB. Quality review bulletin, 1985. **11**(6): p. 180-185.
15. Counsell, S.R., et al., *Geriatric care management for low-income seniors: a randomized controlled trial*. Jama, 2007. **298**(22): p. 2623-2633.
16. Covinsky, K.E., et al., *Do acute care for elders units increase hospital costs? A cost analysis using the hospital perspective*. Journal of the American Geriatrics Society, 1997. **45**(6): p. 729-734.
17. de Lusignan, S., et al., *Compliance and effectiveness of 1 year's home telemonitoring. The report of a pilot study of patients with chronic heart failure*. European journal of heart failure, 2001. **3**(6): p. 723-730.
18. Doughty, R.N., et al., *Randomized, controlled trial of integrated heart failure management. The Auckland Heart Failure Management Study*. European Heart Journal, 2002. **23**(2): p. 139-146.
19. Dunbar, S.B., et al., *Randomized clinical trial of an integrated self-care intervention for persons with heart failure and diabetes: quality of life and physical functioning outcomes*. Journal of cardiac failure, 2015. **21**(9): p. 719-729.
20. Ekman, I., et al., *Feasibility of a nurse-monitored, outpatient-care programme for elderly patients with moderate-to-severe, chronic heart failure*. European Heart Journal, 1998. **19**(8): p. 1254-1260.
21. Fretwell, M.D., et al., *The senior care study: A controlled trial of a consultative/unit-based geriatric assessment program in acute care*. Journal of the American Geriatrics Society, 1990. **38**(10): p. 1073-1081.
22. Gary, R.A., et al., *Combined exercise and cognitive behavioral therapy improves outcomes in patients with heart failure*. Journal of psychosomatic research, 2010. **69**(2): p. 119-131.

23. Gitlin, L.N., et al., *A randomized trial of a multicomponent home intervention to reduce functional difficulties in older adults*. Journal of the American Geriatrics Society, 2006. **54**(5): p. 809-816.
24. Goldberg, L.R., et al., *Randomized trial of a daily electronic home monitoring system in patients with advanced heart failure: the Weight Monitoring in Heart Failure (WHARF) trial*. American heart journal, 2003. **146**(4): p. 705-712.
25. Harrison, M.B., et al., *Quality of life of individuals with heart failure: a randomized trial of the effectiveness of two models of hospital-to-home transition*. Medical care, 2002: p. 271-282.
26. Jaarsma, T., et al., *Effects of education and support on self-care and resource utilization in patients with heart failure*. European heart journal, 1999. **20**(9): p. 673-682.
27. Jerant, A.F., R. Azari, and T.S. Nesbitt, *Reducing the Cost of Frequent Hospital Admissions for Congestive Heart Failure: A Randomized Trial of a Home Telecare Intervention*. Medical Care, 2001. **39**(11): p. 1234-1245.
28. Kasper, E.K., et al., *A randomized trial of the efficacy of multidisciplinary care in heart failure outpatients at high risk of hospital readmission*. Journal of the American College of Cardiology, 2002. **39**(3): p. 471-480.
29. Krumholz, H.M., et al., *Randomized trial of an education and support intervention to prevent readmission of patients with heart failure*. Journal of the American College of Cardiology, 2002. **39**(1): p. 83-89.
30. Lang, C.C., et al., *A randomised controlled trial of a facilitated home-based rehabilitation intervention in patients with heart failure with preserved ejection fraction and their caregivers: the REACH-HFpEF Pilot Study*. BMJ open, 2018. **8**(4): p. e019649.
31. Laramee, A.S., et al., *Case Management in a Heterogeneous Congestive Heart Failure Population: A Randomized Controlled Trial*. JAMA Internal Medicine, 2003. **163**(7): p. 809-817.
32. Ledwidge, M., et al., *Is multidisciplinary care of heart failure cost-beneficial when combined with optimal medical care?* European Journal of Heart Failure, 2003. **5**(3): p. 381-389.
33. Luskin, F., et al., *A controlled pilot study of stress management training of elderly patients with congestive heart failure*. Preventive cardiology, 2002. **5**(4): p. 168-174.
34. Markle-Reid, M., et al., *The effects and costs of a multifactorial and interdisciplinary team approach to falls prevention for older home care clients 'at risk' for falling: a randomized controlled trial*. Canadian Journal on Aging/La Revue canadienne du vieillissement, 2010. **29**(1): p. 139-161.
35. McVey, L.J., et al., *Effect of a geriatric consultation team on functional status of elderly hospitalized patients: a randomized, controlled clinical trial*. Annals of internal medicine, 1989. **110**(1): p. 79-84.
36. Naylor, M., et al., *Comprehensive discharge planning for the hospitalized elderly: a randomized clinical trial*. Annals of internal Medicine, 1994. **120**(12): p. 999-1006.
37. Naylor, M.D., et al., *Comprehensive Discharge Planning and Home Follow-up of Hospitalized Elders A Randomized Clinical Trial*. JAMA, 1999. **281**(7): p. 613-620.
38. Northouse, L.L., et al., *Randomized clinical trial of a family intervention for prostate cancer patients and their spouses*. Cancer: Interdisciplinary International Journal of the American Cancer Society, 2007. **110**(12): p. 2809-2818.
39. Pugh, L.C., et al., *Case management for elderly persons with heart failure: the quality of life and cost outcomes*. MedSurg Nursing, 2001. **10**(2): p. 71.
40. Rainville, E.C., *Impact of pharmacist interventions on hospital readmissions for heart failure*. American Journal of Health-System Pharmacy, 1999. **56**(13): p. 1339-1342.

41. Rich, M.W., et al., *A Multidisciplinary Intervention to Prevent the Readmission of Elderly Patients with Congestive Heart Failure*. *New England Journal of Medicine*, 1995. **333**(18): p. 1190-1195.
42. Rich, M.W., et al., *Prevention of readmission in elderly patients with congestive heart failure*. *Journal of General Internal Medicine*, 1993. **8**(11): p. 585-590.
43. Riegel, B., et al., *Effect of a Standardized Nurse Case-Management Telephone Intervention on Resource Use in Patients With Chronic Heart Failure*. *JAMA Internal Medicine*, 2002. **162**(6): p. 705-712.
44. Rubenstein, L.Z., et al., *Effectiveness of a geriatric evaluation unit: a randomized clinical trial*. *New England Journal of Medicine*, 1984. **311**(26): p. 1664-1670.
45. Rubin, C.D., et al., *A randomized, controlled trial of outpatient geriatric evaluation and management in a large public hospital*. *Journal of the American Geriatrics Society*, 1993. **41**(10): p. 1023-1028.
46. Saltvedt, I., et al., *Randomised trial of in-hospital geriatric intervention: impact on function and morale*. *Gerontology*, 2006. **52**(4): p. 223-230.
47. Serxner, S., M. Miyaji, and J. Jeffords, *Congestive heart failure disease management study: a patient education intervention*. *Congestive Heart Failure*, 1998. **4**: p. 23-28.
48. Sherwood, A., et al., *Effects of coping skills training on quality of life, disease biomarkers, and clinical outcomes in patients with heart failure: a randomized clinical trial*. *Circulation: Heart Failure*, 2017. **10**(1): p. e003410.
49. Stewart, S., S. Pearson, and J.D. Horowitz, *Effects of a Home-Based Intervention Among Patients With Congestive Heart Failure Discharged From Acute Hospital Care*. *JAMA Internal Medicine*, 1998. **158**(10): p. 1067-1072.
50. Stewart, M., et al., *The impact of a geriatrics evaluation and management unit compared to standard care in a community teaching hospital*. *Maryland medical journal (Baltimore, Md.: 1985)*, 1999. **48**(2): p. 62-67.
51. Strömberg, A., et al., *Nurse-led heart failure clinics improve survival and self-care behaviour in patients with heart failure: Results from a prospective, randomised trial*. *European Heart Journal*, 2003. **24**(11): p. 1014-1023.
52. Thomas, D.R., R. Brahan, and B.P. Haywood, *Inpatient community-based geriatric assessment reduces subsequent mortality*. *Journal of the American Geriatrics Society*, 1993. **41**(2): p. 101-104.
53. Trochu, J., S. Baleynaud, and G. Mialet, *Efficacy of a multidisciplinary management of chronic heart failure patients: one year results of a multicentre randomized trial in French medical practice*. *Eur Heart J*, 2004.
54. Tsuyuki, R.T., et al., *A multicenter disease management program for hospitalized patients with heart failure*. *Journal of Cardiac Failure*, 2004. **10**(6): p. 473-80.
55. Varma, S., et al., *Pharmaceutical care of patients with congestive heart failure: interventions and outcomes*. *Pharmacotherapy: The Journal of Human Pharmacology and Drug Therapy*, 1999. **19**(7): p. 860-869.
56. Vidán, M.T., et al., *An intervention integrated into daily clinical practice reduces the incidence of delirium during hospitalization in elderly patients*. *Journal of the American Geriatrics Society*, 2009. **57**(11): p. 2029-2036.
57. Wang, T.-C., et al., *Effects of a supportive educational nursing care programme on fatigue and quality of life in patients with heart failure: a randomised controlled trial*. *European Journal of Cardiovascular Nursing*, 2016. **15**(2): p. 157-167.
58. Yu, D.S., D.T. Lee, and J. Woo, *Improving health-related quality of life of patients with chronic heart failure: effects of relaxation therapy*. *Journal of advanced nursing*, 2010. **66**(2): p. 392-403.
59. Zelada, M.A., R. Salinas, and J.J. Baztán, *Reduction of functional deterioration during hospitalization in an acute geriatric unit*. *Archives of gerontology and geriatrics*, 2009. **48**(1): p. 35-39.

60. Bakitas, M., et al., *Effects of a palliative care intervention on clinical outcomes in patients with advanced cancer: the Project ENABLE II randomized controlled trial*. *Jama*, 2009. **302**(7): p. 741-749.
61. Bakitas, M.A., et al., *Early versus delayed initiation of concurrent palliative oncology care: patient outcomes in the ENABLE III randomized controlled trial*. *Journal of Clinical Oncology*, 2015. **33**(13): p. 1438.
62. Brännström, M. and K. Boman, *Effects of person-centred and integrated chronic heart failure and palliative home care. PREFER: a randomized controlled study*. *European journal of heart failure*, 2014. **16**(10): p. 1142-1151.
63. Edmonds, P., et al., *Palliative care for people severely affected by multiple sclerosis: evaluation of a novel palliative care service*. *Multiple Sclerosis Journal*, 2010. **16**(5): p. 627-636.
64. Given, B., et al. *Pain and fatigue management: results of a nursing randomized clinical trial*. in *Oncology nursing forum*. 2002.
65. Higginson, I.J., et al., *An integrated palliative and respiratory care service for patients with advanced disease and refractory breathlessness: a randomised controlled trial*. *Lancet Respiratory Medicine*, 2014. **2**(12): p. 979-987.
66. Jordhøy, M.S., et al., *Quality of life in palliative cancer care: results from a cluster randomized trial*. *Journal of Clinical Oncology*, 2001. **19**(18): p. 3884-3894.
67. Lowther, K., et al., *Nurse-led palliative care for HIV-positive patients taking antiretroviral therapy in Kenya: a randomised controlled trial*. *The lancet HIV*, 2015. **2**(8): p. e328-e334.
68. Maltoni, M., et al., *Systematic versus on-demand early palliative care: results from a multicentre, randomised clinical trial*. *European Journal of Cancer*, 2016. **65**: p. 61-68.
69. Ozcelik, H., et al., *Examining the effect of the case management model on patient results in the palliative care of patients with cancer*. *American Journal of Hospice and Palliative Medicine®*, 2014. **31**(6): p. 655-664.
70. Rogers, J.G., et al., *Palliative care in heart failure: the PAL-HF randomized, controlled clinical trial*. *Journal of the American College of Cardiology*, 2017. **70**(3): p. 331-341.
71. Rummans, T.A., et al., *Impacting quality of life for patients with advanced cancer with a structured multidisciplinary intervention: a randomized controlled trial*. *Journal of Clinical Oncology*, 2006. **24**(4): p. 635-642.
72. Sidebottom, A.C., et al., *Inpatient palliative care for patients with acute heart failure: outcomes from a randomized trial*. *Journal of palliative medicine*, 2015. **18**(2): p. 134-142.
73. Steel, J.L., et al., *Web-based collaborative care intervention to manage cancer-related symptoms in the palliative care setting*. *Cancer*, 2016. **122**(8): p. 1270-1282.
74. Tattersall, M., et al., *Early contact with palliative care services: A randomised trial in patients with newly detected incurable metastatic cancer*. 2014.
75. Temel, J.S., et al., *Early palliative care for patients with metastatic non-small-cell lung cancer*. *New England Journal of Medicine*, 2010. **363**(8): p. 733-742.
76. Temel, J.S., et al., *Effects of early integrated palliative care in patients with lung and GI cancer: a randomized clinical trial*. *Journal of Clinical Oncology*, 2017. **35**(8): p. 834.
77. Wong, F.K.Y., et al., *Effects of a transitional palliative care model on patients with end-stage heart failure: a randomised controlled trial*. *Heart*, 2016. **102**(14): p. 1100-1108.
78. Zimmermann, C., et al., *Early palliative care for patients with advanced cancer: a cluster-randomised controlled trial*. *The Lancet*, 2014. **383**(9930): p. 1721-1730.
